# Supplementary figures and images for: The phylogenetic and geographic structure of Y-chromosome haplogroup R1a
Source: Springer Nature journal article supplement (doi:10.1038/ejhg.2014.50), 2014-03-26

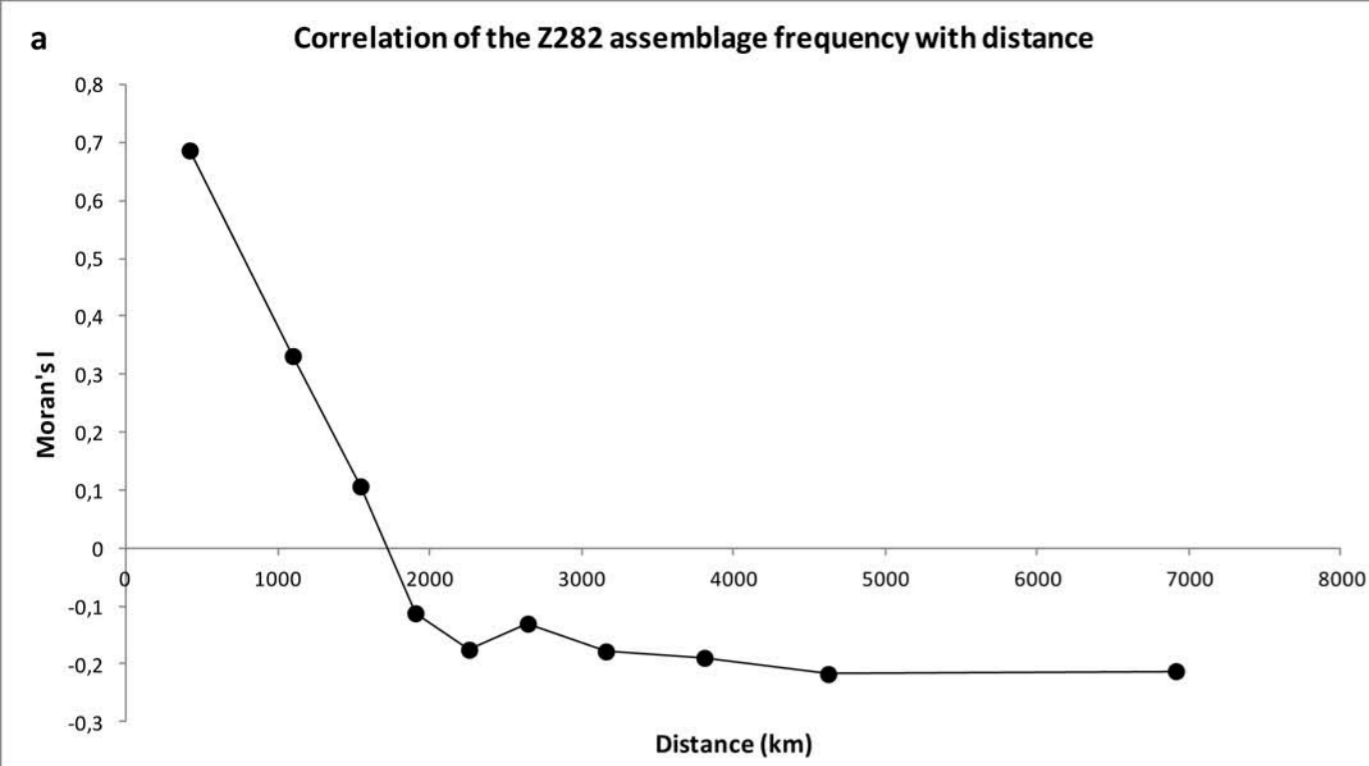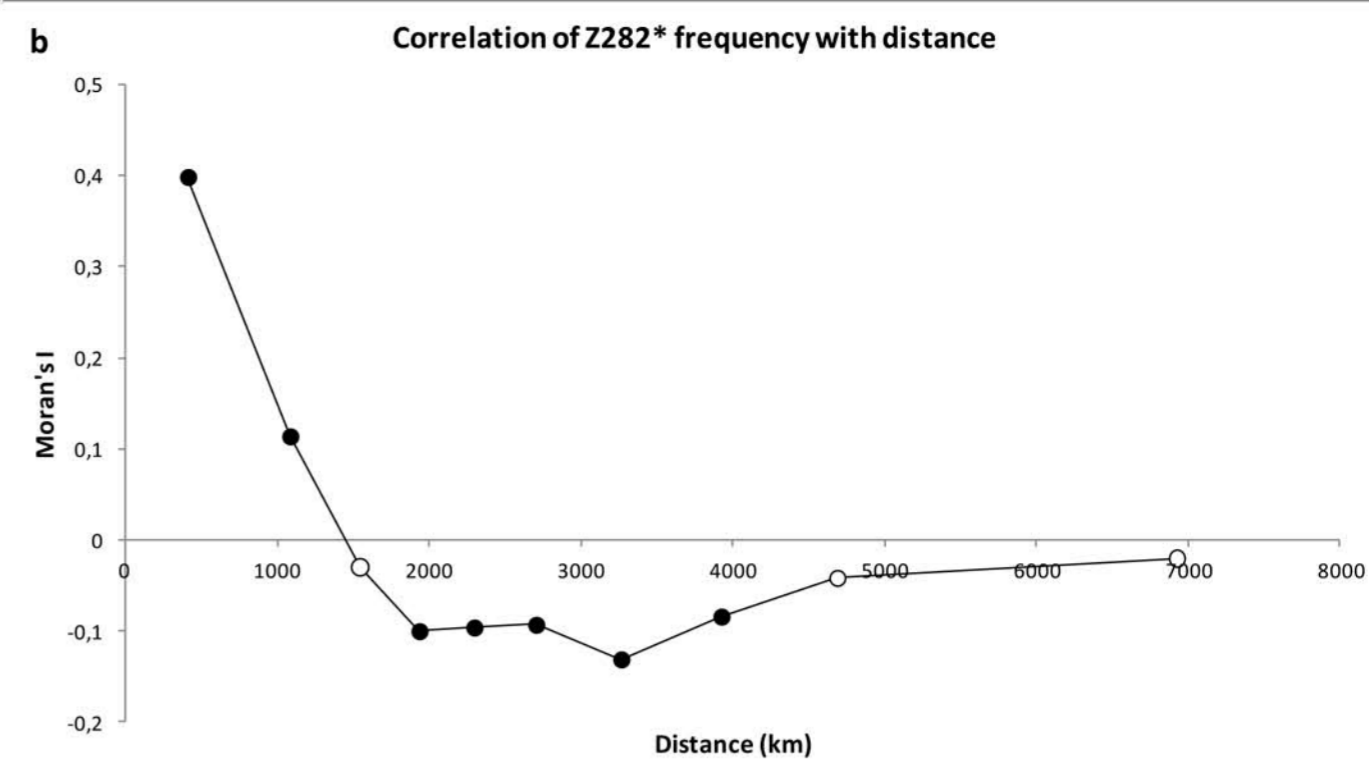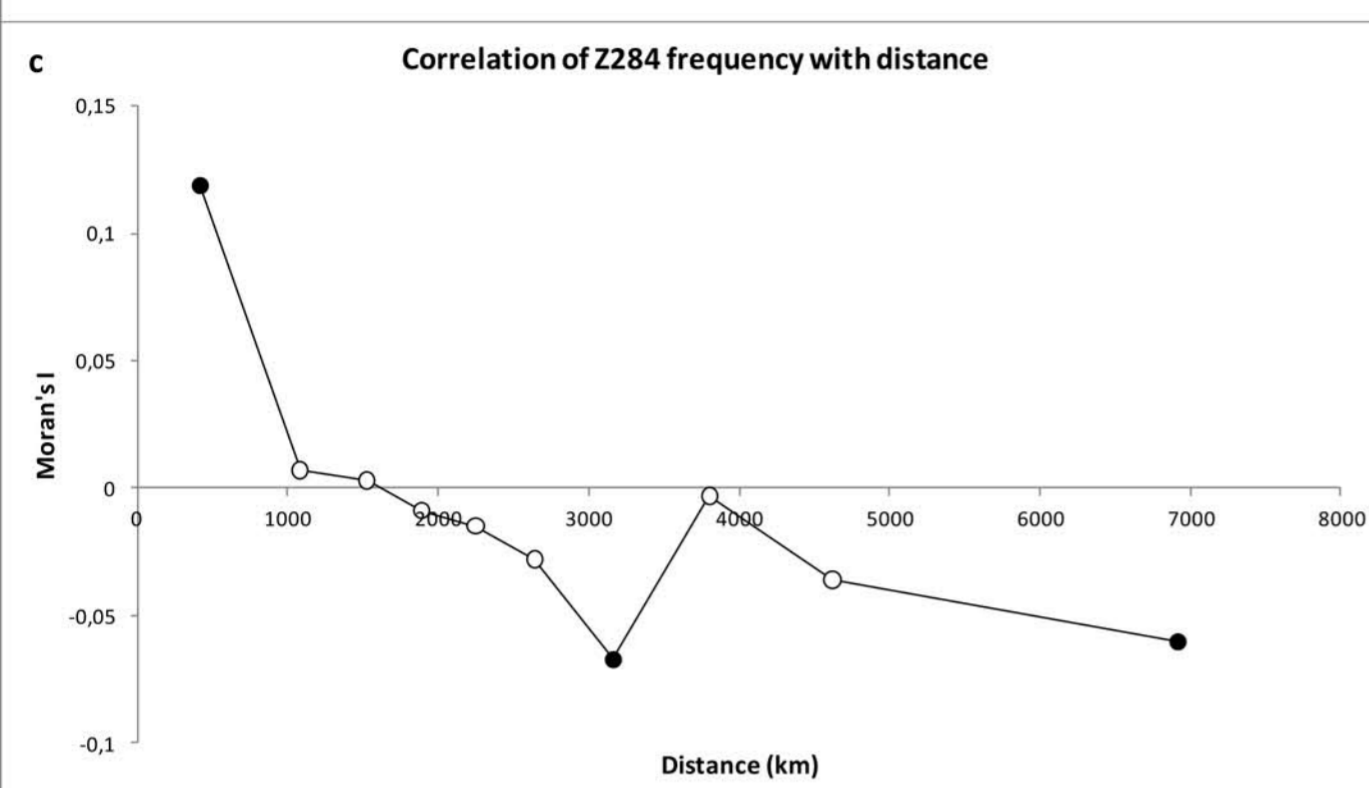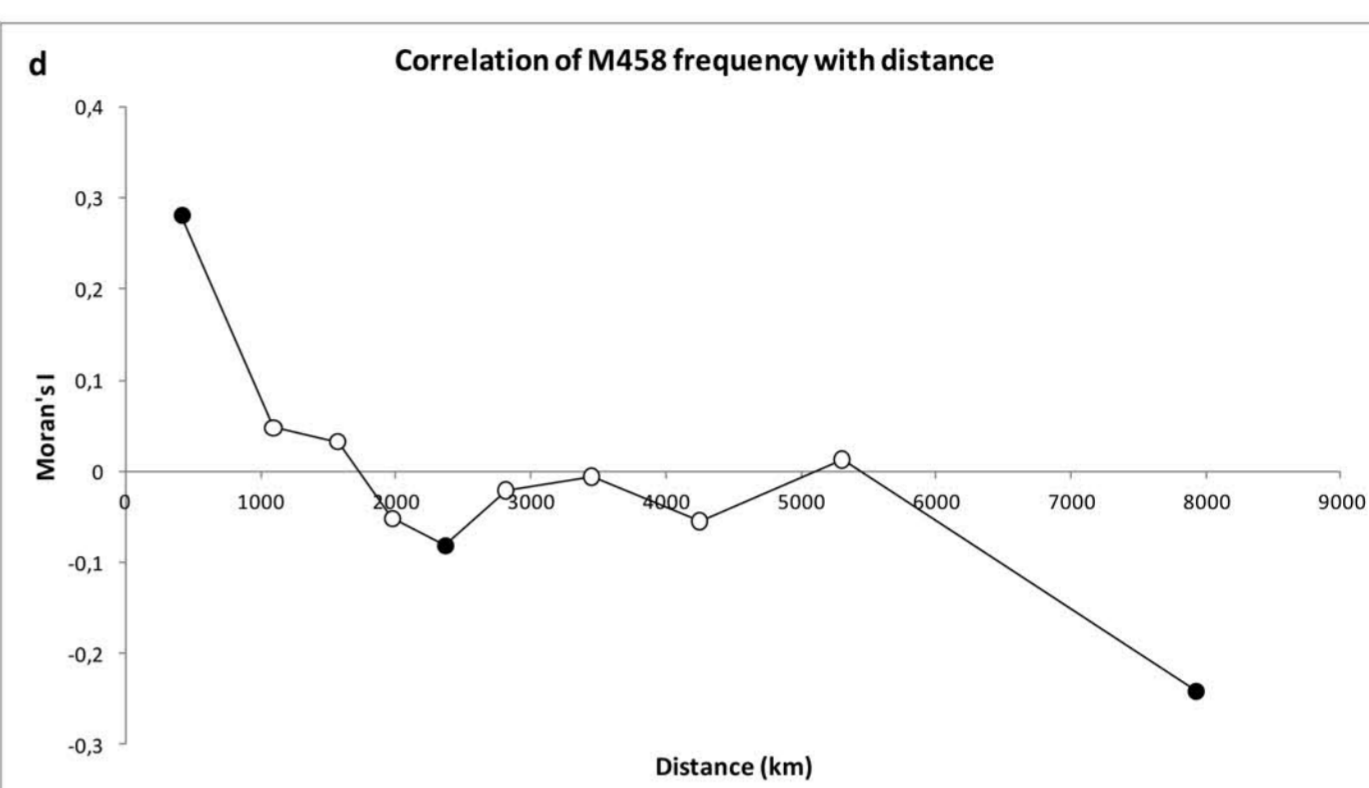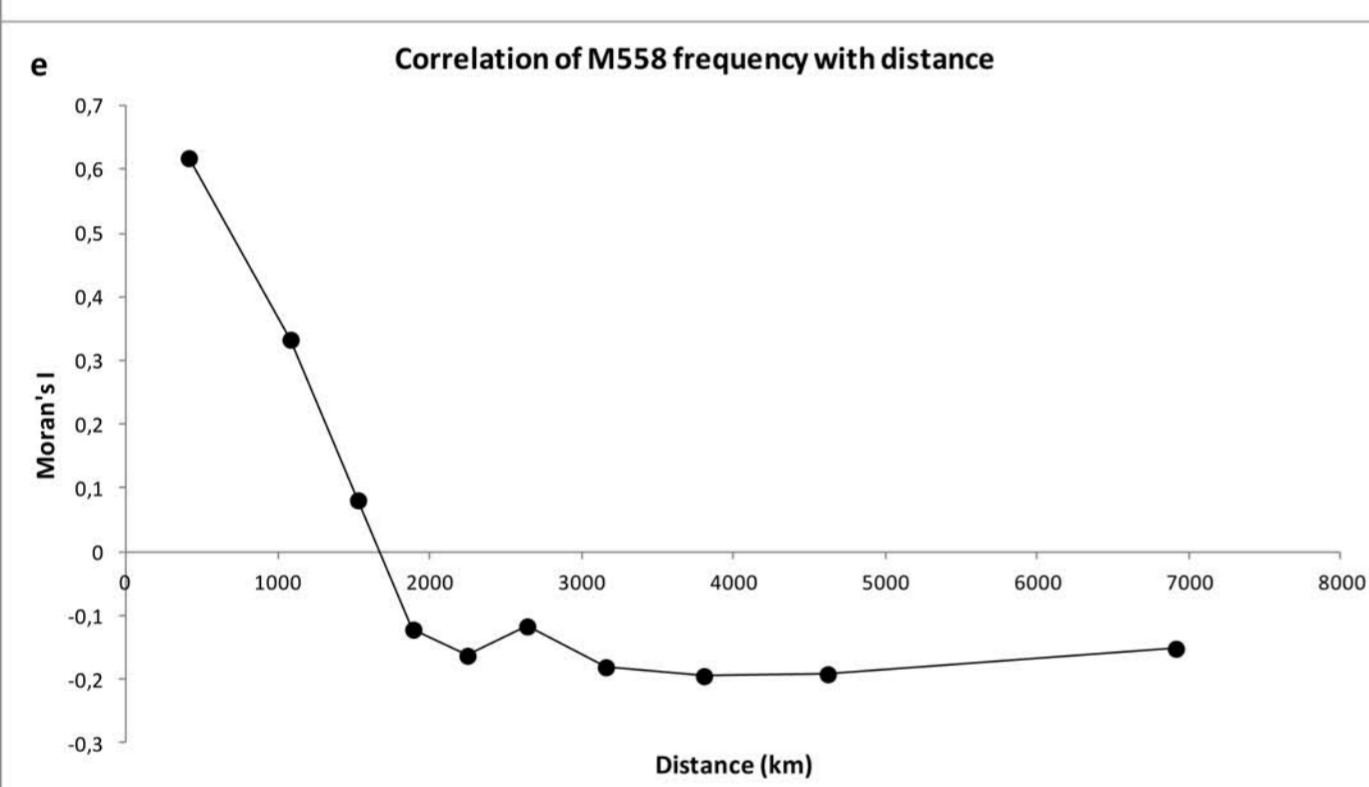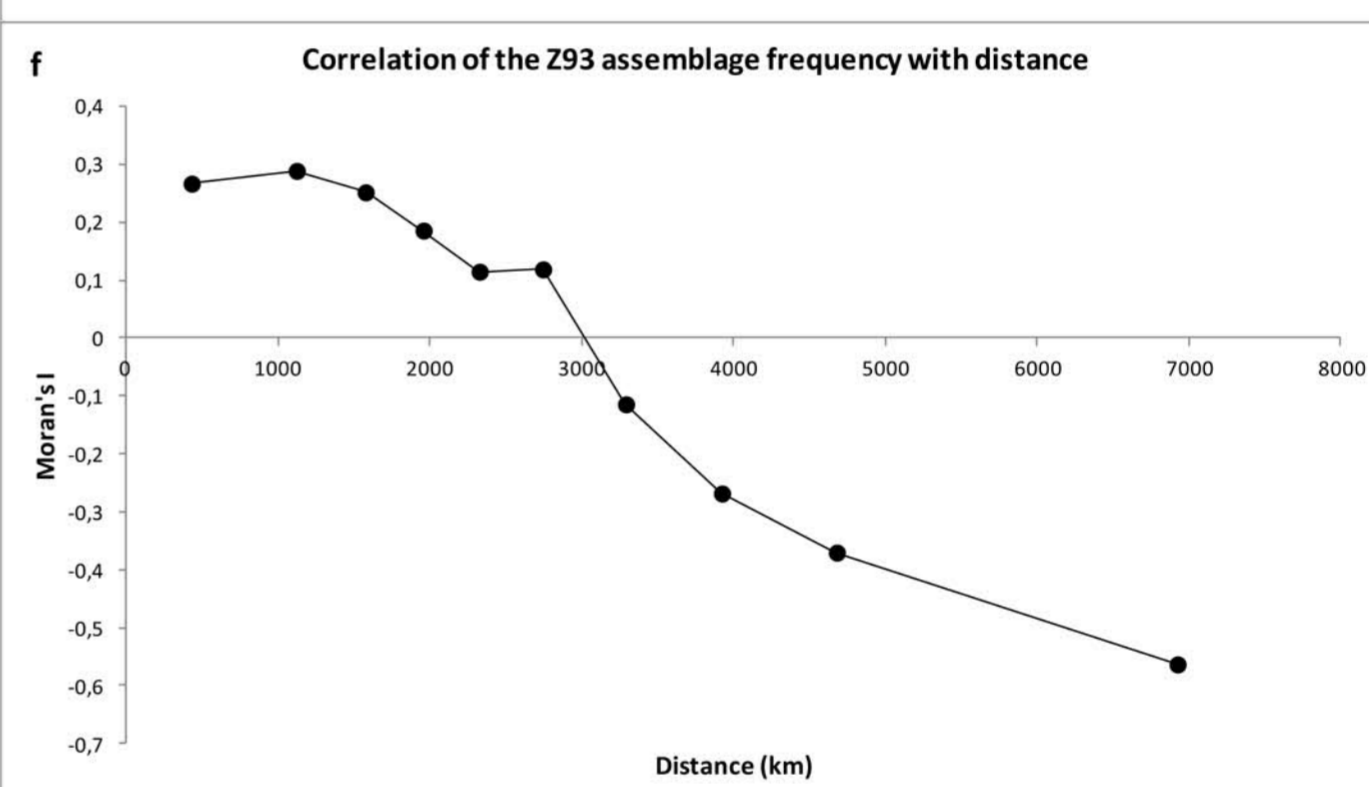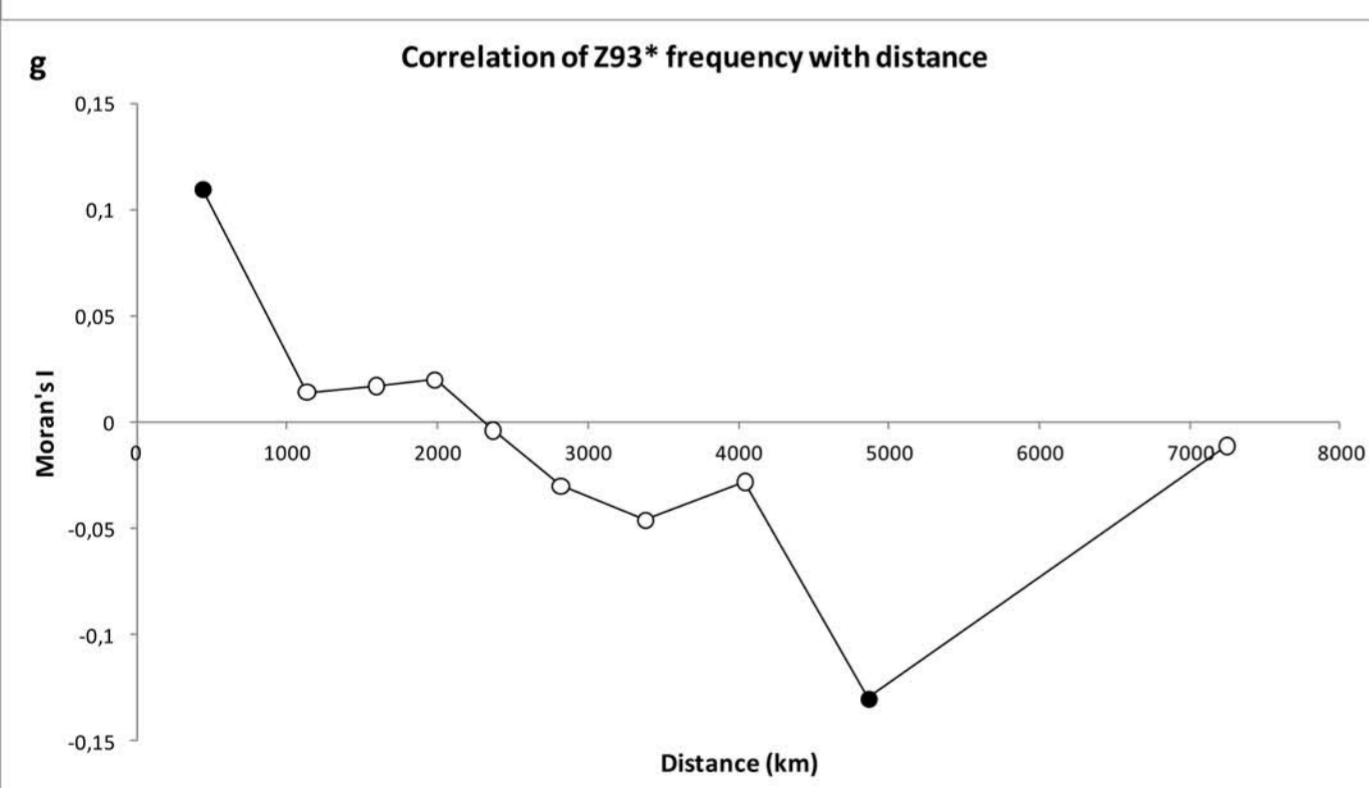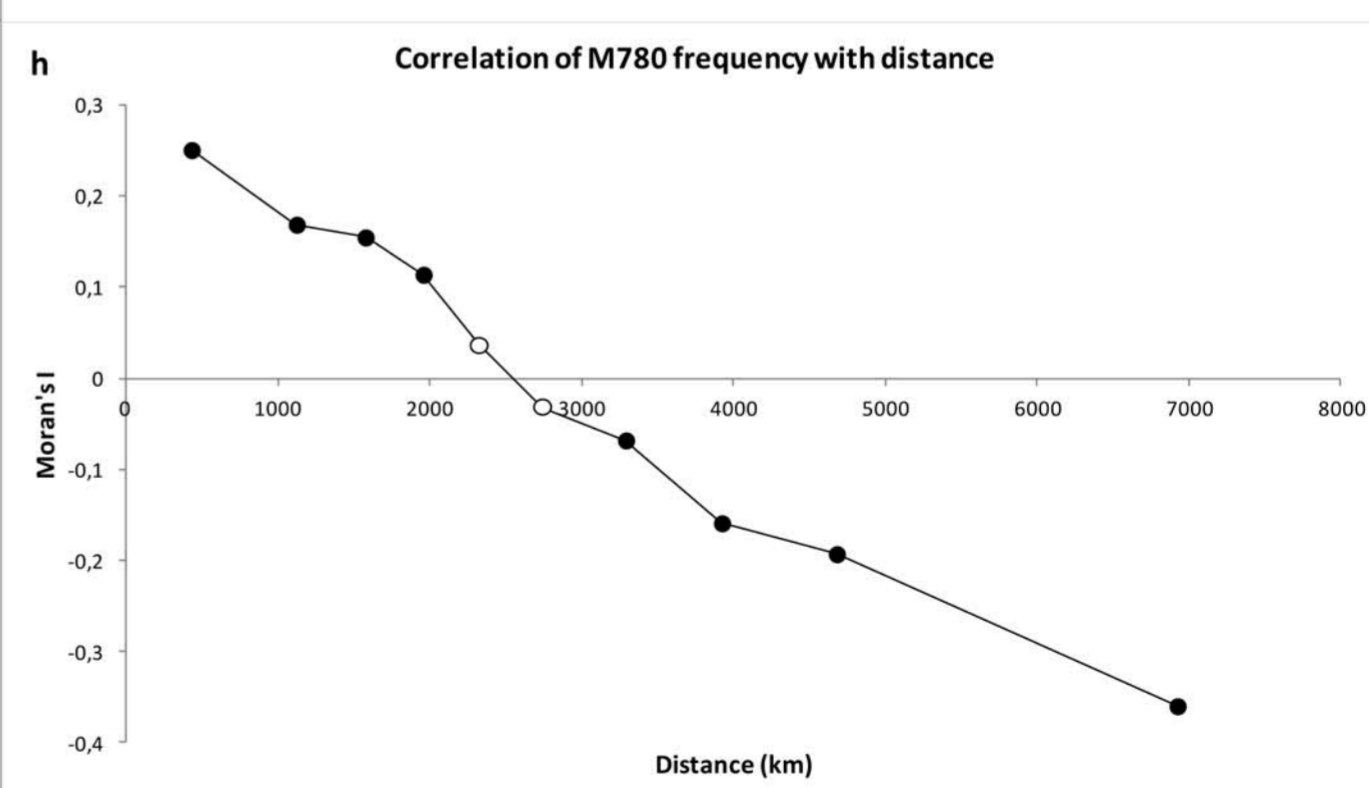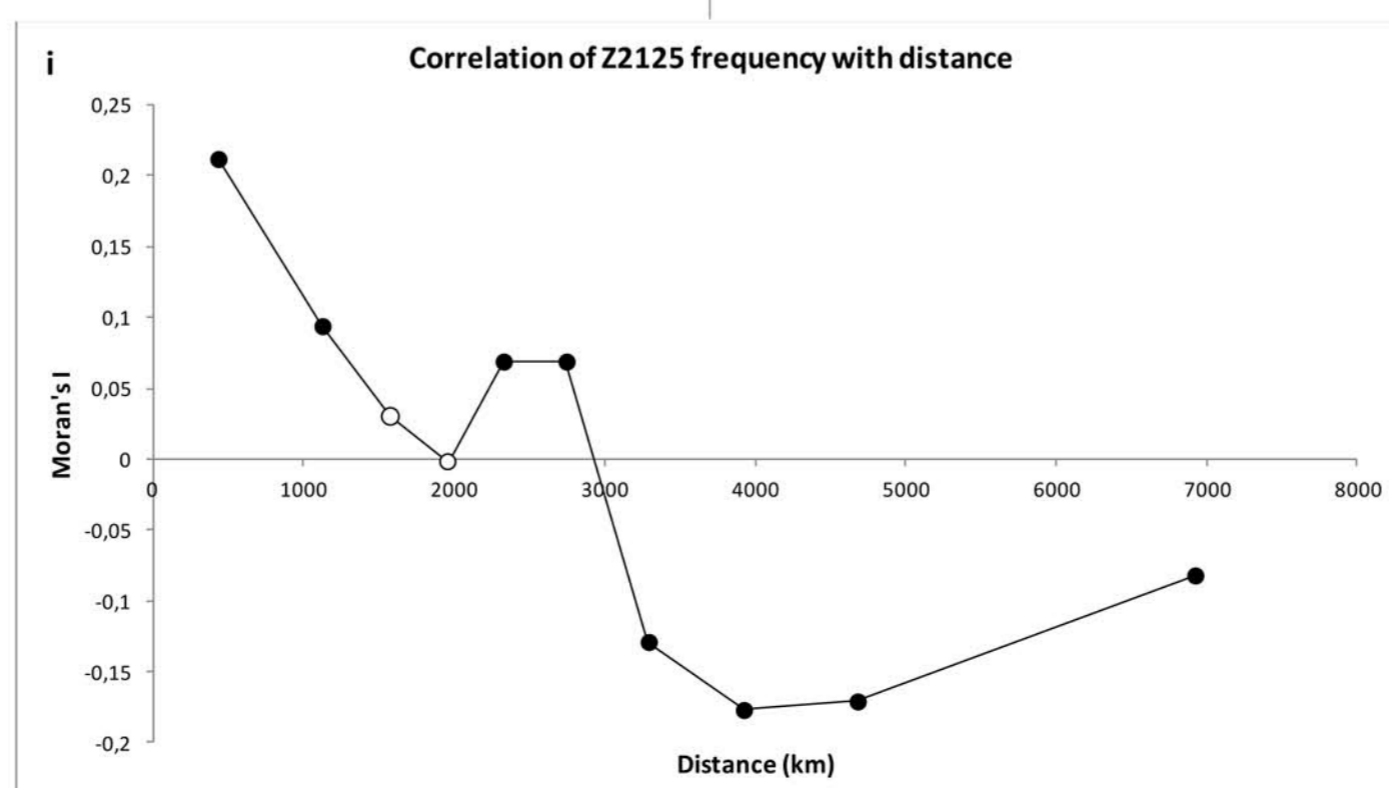

Supplement: 41431_2015_BFejhg201450_MOESM13_ESM.pdf [file 41431_2015_BFejhg201450_MOESM13_ESM.pdf]
